# Supplementary material for: The Role of OOH Binding Site and Pt Surface Structure on ORR Activities
Source: PubMed Central journal article supplement (PMC4501392; doi:10.1149/2.1071412jes), 2014-09-22
Supplement: NIHMS702725-supplement-sopporting_materials.pdf [file NIHMS702725-supplement-sopporting_materials.pdf]

1 **SUPPLEMENTARY INFORMATION**

2  
3  
4 **The role of OOH binding site and Pt surface structure on ORR activities**

5  
6 Qingying Jia<sup>†</sup>, Keegan Caldwell<sup>‡</sup>, Joseph M. Ziegelbauer<sup>§</sup>, Sanjeev Mukerjee<sup>†</sup> and David E.  
7 Ramaker<sup>‡</sup>

8  
9 <sup>†</sup> Dept. of Chemistry & Chemical Biology, Northeastern University, Boston, MA 02115

10  
11 <sup>‡</sup> Department of Chemistry, George Washington University, Washington, D.C. 20052

12  
13 <sup>§</sup> Electrochemical Energy Research Lab, General Motors Research & Development, Warren, MI  
14 48090

15

16

17

18

19

20

21

22

23

24

25

26

27

28

29

**Table S1: Symbol translation table**

| Catalyst symbol used here | Catalyst symbol used in Ref. 40 (Page 7) | Pre-cursor        | Dealloying gaseous environment | De-alloying acid               | Post annealing <sup>2</sup> |
|---------------------------|------------------------------------------|-------------------|--------------------------------|--------------------------------|-----------------------------|
| ANAu                      | 176NA                                    | PtNi <sub>3</sub> | Air                            | HNO <sub>3</sub>               | No                          |
| N <sub>2</sub> NAu        | 280NA                                    | PtNi <sub>3</sub> | N <sub>2</sub>                 | HNO <sub>3</sub>               | No                          |
| N <sub>2</sub> SAu        | 280SA                                    | PtNi <sub>3</sub> | N <sub>2</sub>                 | H <sub>2</sub> SO <sub>4</sub> | No                          |
| N <sub>2</sub> SAa        | 280SA-AN                                 | PtNi <sub>3</sub> | N <sub>2</sub>                 | H <sub>2</sub> SO <sub>4</sub> | Yes                         |

30

**EXAFS analysis**

32

33

34

**Table S2: Summary of EXAFS results \***

| Catalyst symbol    | Cycling stage | R <sub>Pt-Pt</sub>          | R <sub>Pt-Ni</sub> | R <sub>Ni-Ni</sub> | N <sub>Pt-Pt</sub>       | N <sub>Pt-Ni</sub> | N <sub>Ni-Pt</sub>       | N <sub>Ni-Ni</sub> | σ <sup>2</sup> <sub>Pt-Pt</sub>         | σ <sup>2</sup> <sub>Pt-Ni</sub> | σ <sup>2</sup> <sub>Ni-Ni</sub> | R-factor |
|--------------------|---------------|-----------------------------|--------------------|--------------------|--------------------------|--------------------|--------------------------|--------------------|-----------------------------------------|---------------------------------|---------------------------------|----------|
|                    |               | (ΔR = ±0.008Å) <sup>a</sup> |                    |                    | (ΔN = ±0.9) <sup>b</sup> |                    | (ΔN = ±0.5) <sup>b</sup> |                    | (Δσ <sup>2</sup> = ±0.007) <sup>c</sup> |                                 |                                 |          |
| ANAu               | BOL           | 2.738                       | 2.630              | 2.572              | 9.2                      | 0.7                | 7.5                      | 4.4                |                                         |                                 |                                 | 0.005    |
|                    | 10 k          | 2.743                       | 2.650              | 2.575              | 9.6                      | 0.6                | 6.8                      | 4.1                | 0.005                                   | 0.010                           | 0.009                           | 0.007    |
|                    | 30 k          | 2.748                       | 2.650              | 2.577              | 10.3                     | 0.4                | 5.9                      | 4.7                |                                         |                                 |                                 | 0.004    |
| N <sub>2</sub> NAu | BOL           | 2.713                       | 2.611              | 2.570              | 8.1                      | 1.8                | 6.9                      | 5.5                |                                         |                                 |                                 | 0.007    |
|                    | 10 k          | 2.724                       | 2.631              | 2.574              | 9.1                      | 1.2                | 6.7                      | 5.5                | 0.004                                   | 0.010                           | 0.011                           | 0.009    |
|                    | 30 k          | 2.742                       | 2.631              | 2.543              | 10.6                     | 0.4                | 6.3                      | 5.6                |                                         |                                 |                                 | 0.009    |
| N <sub>2</sub> SAu | BOL           | 2.696                       | 2.601              | 2.581              | 7.3                      | 2.5                | 4.8                      | 7.7                |                                         |                                 |                                 | 0.010    |
|                    | 10 k          | 2.716                       | 2.604              | 2.574              | 8.2                      | 2.2                | 3.8                      | 7.4                | 0.007                                   | 0.005                           | 0.011                           | 0.012    |
|                    | 30 k          | 2.736                       | 2.600              | 2.580              | 9.7                      | 1.3                | 3.7                      | 7.4                |                                         |                                 |                                 | 0.008    |
| N <sub>2</sub> SAa | BOL           | 2.693                       | 2.598              | 2.578              | 8.8                      | 2.1                | 5.2                      | 7.1                | 0.007                                   | 0.005                           | 0.011                           | 0.006    |
|                    | 10 k          | 2.717                       | 2.600              | 2.575              |                          |                    |                          |                    |                                         |                                 |                                 |          |
|                    | 30 k          | 2.734                       | 2.604              | 2.570              | 10.4                     | 0.9                | 4.6                      | 6.9                | 0.007                                   | 0.005                           | 0.011                           | 0.010    |

35 \*All the data were collected at 0.54 V vs RHE (double layer region) in N<sub>2</sub>-saturated 0.1 M HClO<sub>4</sub>  
36 electrolyte except for the Pt L<sub>3</sub> edge data of the 10k-cycled N<sub>2</sub>SAa catalyst that were collected  
37 under *ex situ* conditions (thus only the bond distance values are given). S<sub>0</sub><sup>2</sup> fixed at 0.766 and  
38 0.682 for Pt and Ni, respectively as obtained by fitting the reference foils. Fits were done in R-  
39 space, k<sup>1,2,3</sup> weighting at Pt L<sub>3</sub> and Ni k edges simultaneously. For Pt, 1.1 < R < 3.4 Å and Δk =  
40 2.95 - 12.14 Å<sup>-1</sup> were used; for Ni, 1.2 < R < 3.0 Å and Δk = 1.87 - 11.93 Å<sup>-1</sup> were used. <sup>a,b,c</sup>Values  
41 represent the largest statistical errors of all of the least-squares fits determined by ARTEMIS.

42

43

44

45

46

47

48

49

50  
51  
52  
53  
54

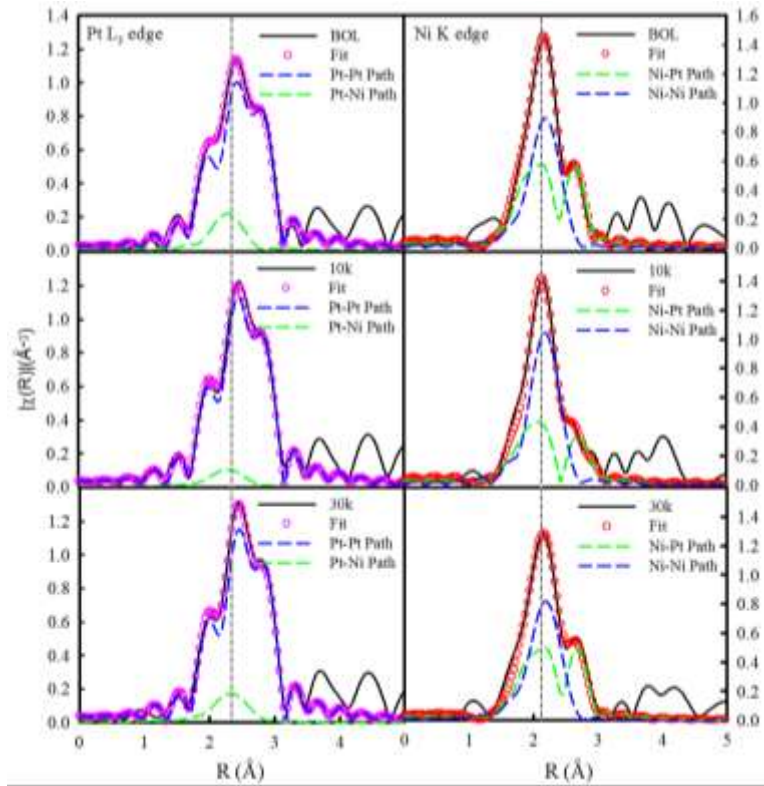

55

56 **Figure S1.** Pt L<sub>3</sub> edge (left) and Ni K edge (right) EXAFS spectra collected at 0.54 V in N<sub>2</sub>-  
57 saturated 0.1 M HClO<sub>4</sub> electrolyte and the corresponding least-squares fits for dealloyed PtNi<sub>3</sub>/C  
58 (ANAu) NP catalyst under different voltage cycling stages: BOL (top), 10k (middle), and 30k  
59 (bottom). The vertical black lines are drawn as guides to the eye.

60

61

62

63

64

65

66  
67  
68  
69

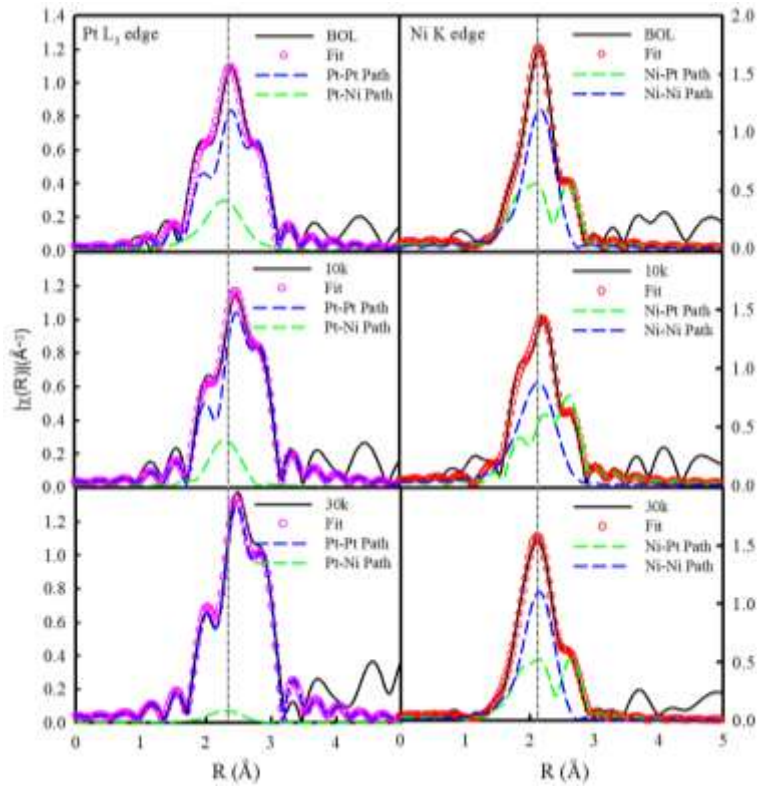

70  
71  
72  
73  
74  
75  
76  
77  
78  
79

**Figure S2.** Pt L<sub>3</sub> edge (left) and Ni K edge (right) EXAFS spectra collected at 0.54 V in N<sub>2</sub>-saturated 0.1 M HClO<sub>4</sub> electrolyte and the corresponding least-squares fits for dealloyed PtNi<sub>3</sub>/C (N<sub>2</sub>NAu) NP catalyst under different voltage cycling stages: BOL (top), 10k (middle), and 30k (bottom). The vertical black lines are drawn as guides to the eye.

80

81

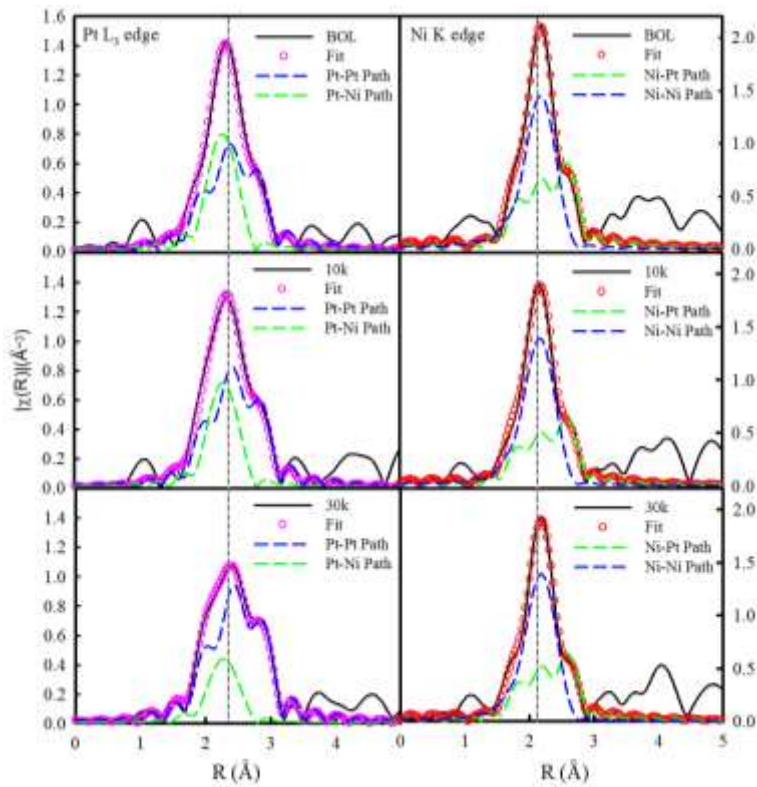

82

83 **Figure S3.** Pt L<sub>3</sub> edge (left) and Ni K edge (right) EXAFS spectra collected at 0.54 V in N<sub>2</sub>-  
84 saturated 0.1 M HClO<sub>4</sub> electrolyte and the corresponding least-squares fits for dealloyed PtNi<sub>3</sub>/C  
85 (N<sub>2</sub>SAu) NP catalyst under different voltage cycling stages: BOL (top), 10k (middle), and 30k  
86 (bottom). The vertical black lines are drawn as guides to the eye.

87

88

89

90

91

92

93

94

95

96

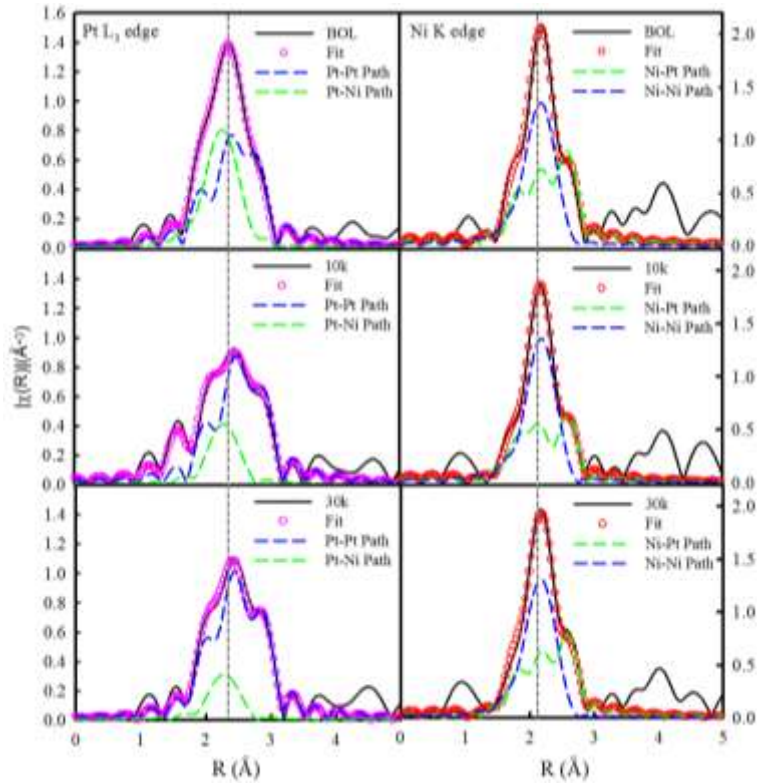

97

98 **Figure S4.** Pt L<sub>3</sub> edge (left) and Ni K edge (right) EXAFS spectra collected at 0.54 V in N<sub>2</sub>-

99 saturated 0.1 M HClO<sub>4</sub> electrolyte and the corresponding least-squares fits for dealloyed PtNi<sub>3</sub>/C

100 (N<sub>2</sub>SAA) NP catalyst under different voltage cycling stages: BOL (top), 10k (the Pt L<sub>3</sub> edge data

101 were collected under ex situ condition) (middle), and 30k (bottom). The vertical black lines are

102 drawn as guides to the eye.

103

104

105

106

107

108 **XANES data**

109

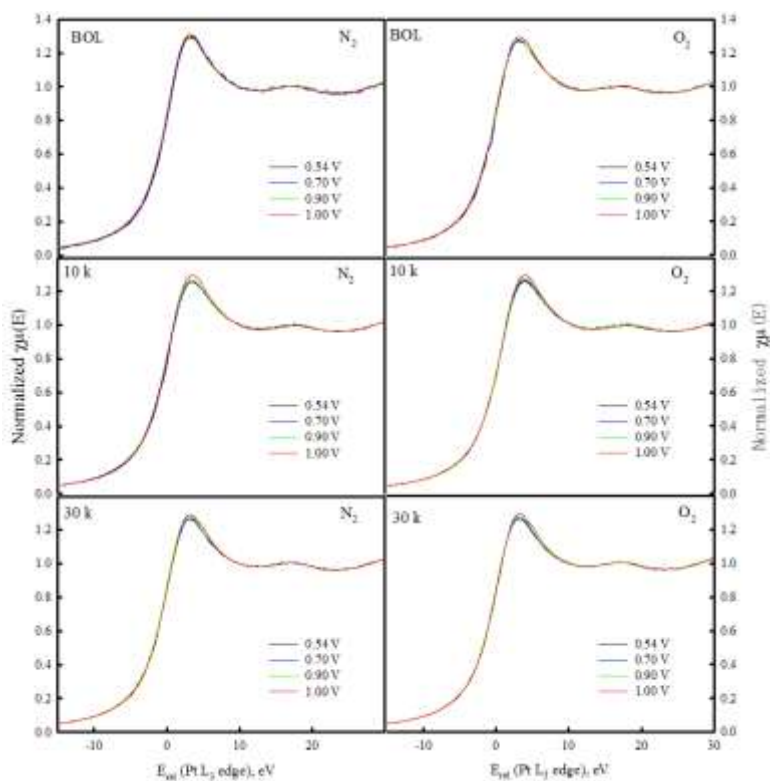

110

111 **Figure S5.** Normalized Pt L<sub>3</sub> edge XANES spectra collected at various potentials in N<sub>2</sub>- (left) or O<sub>2</sub>-  
112 (right) saturated 0.1 M HClO<sub>4</sub> electrolyte for dealloyed PtNi<sub>3</sub>/C (ANAu) NP catalyst under  
113 different voltage cycling stages: BOL (top), 10k (middle), and 30k (bottom).

114

115

116

117

118

119

120

121

122

123

124

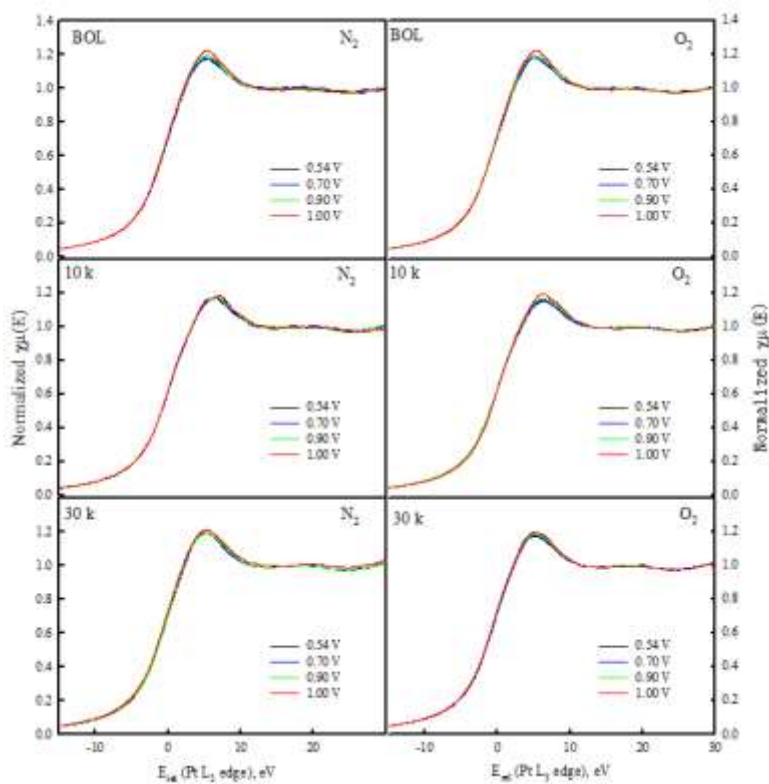

125

126 **Figure S6.** Normalized Pt L<sub>3</sub> edge XANES spectra collected at various potentials in N<sub>2</sub>- (left) or O<sub>2</sub>-

127 (right) saturated 0.1 M HClO<sub>4</sub> electrolyte for dealloyed PtNi<sub>3</sub>/C (N<sub>2</sub>NAu) NP catalyst under

128 different voltage cycling stages: BOL (top), 10k (middle), and 30k (bottom).

129

130

131

132

133

134



135  
136  
137  
138  
139  
140

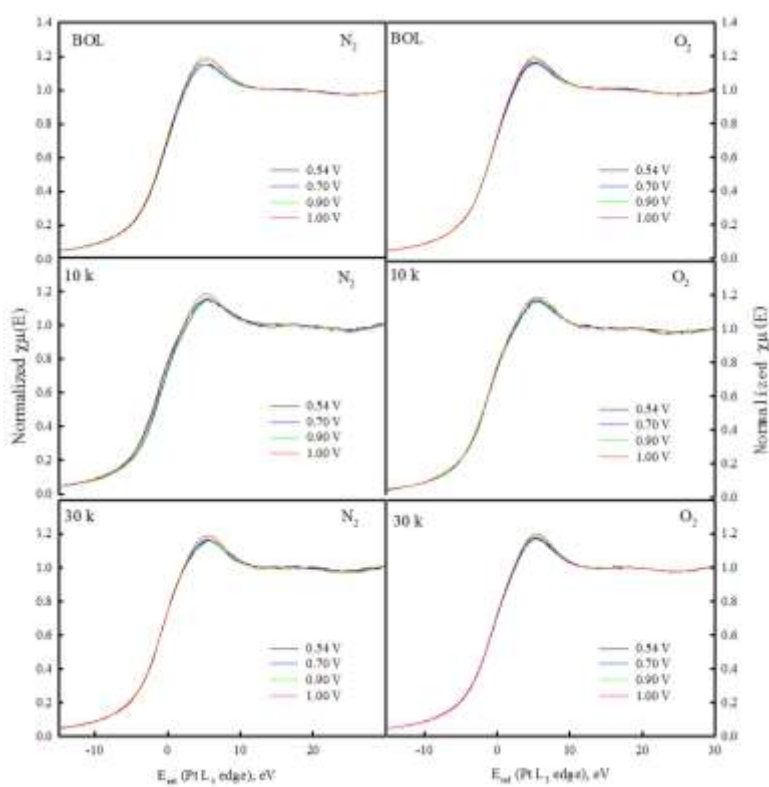

141  
142 **Figure S7.** Normalized Pt L<sub>3</sub> edge XANES spectra collected at various potentials in N<sub>2</sub>- (left) or O<sub>2</sub>-  
143 (right) saturated 0.1 M HClO<sub>4</sub> electrolyte for dealloyed PtNi<sub>3</sub>/C (N<sub>2</sub>SAu) NP catalyst under  
144 different voltage cycling stages: BOL (top), 10k (middle), and 30k (bottom).

145  
146  
147  
148

149  
150  
151  
152  
153  
154

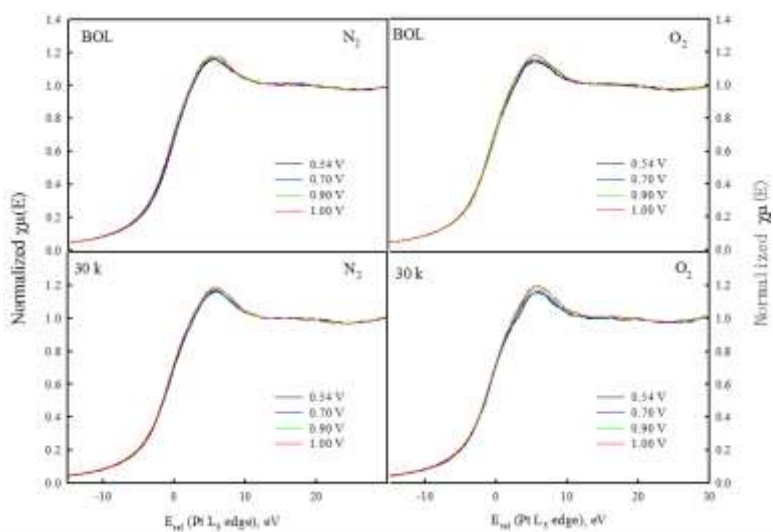

155  
156  
157  
158  
159  
160

**Figure S8.** Normalized Pt L<sub>3</sub> edge XANES spectra collected at various potentials in N<sub>2</sub>- (left) or O<sub>2</sub>- (right) saturated 0.1 M HClO<sub>4</sub> electrolyte for dealloyed PtNi<sub>3</sub>/C (N<sub>2</sub>SAA) NP catalyst under different voltage cycling stages: BOL (top) and 30k (bottom).
